# Supplementary material for: The Value of CXCL1, CXCL2, CXCL3, and CXCL8 as Potential Prognosis Markers in Cervical Cancer: Evidence of E6/E7 from HPV16 and 18 in Chemokines Regulation
Source: MDPI journal article supplement (doi:10.3390/biomedicines11102655), 2023-09-28
Supplement: s1 [file s1]

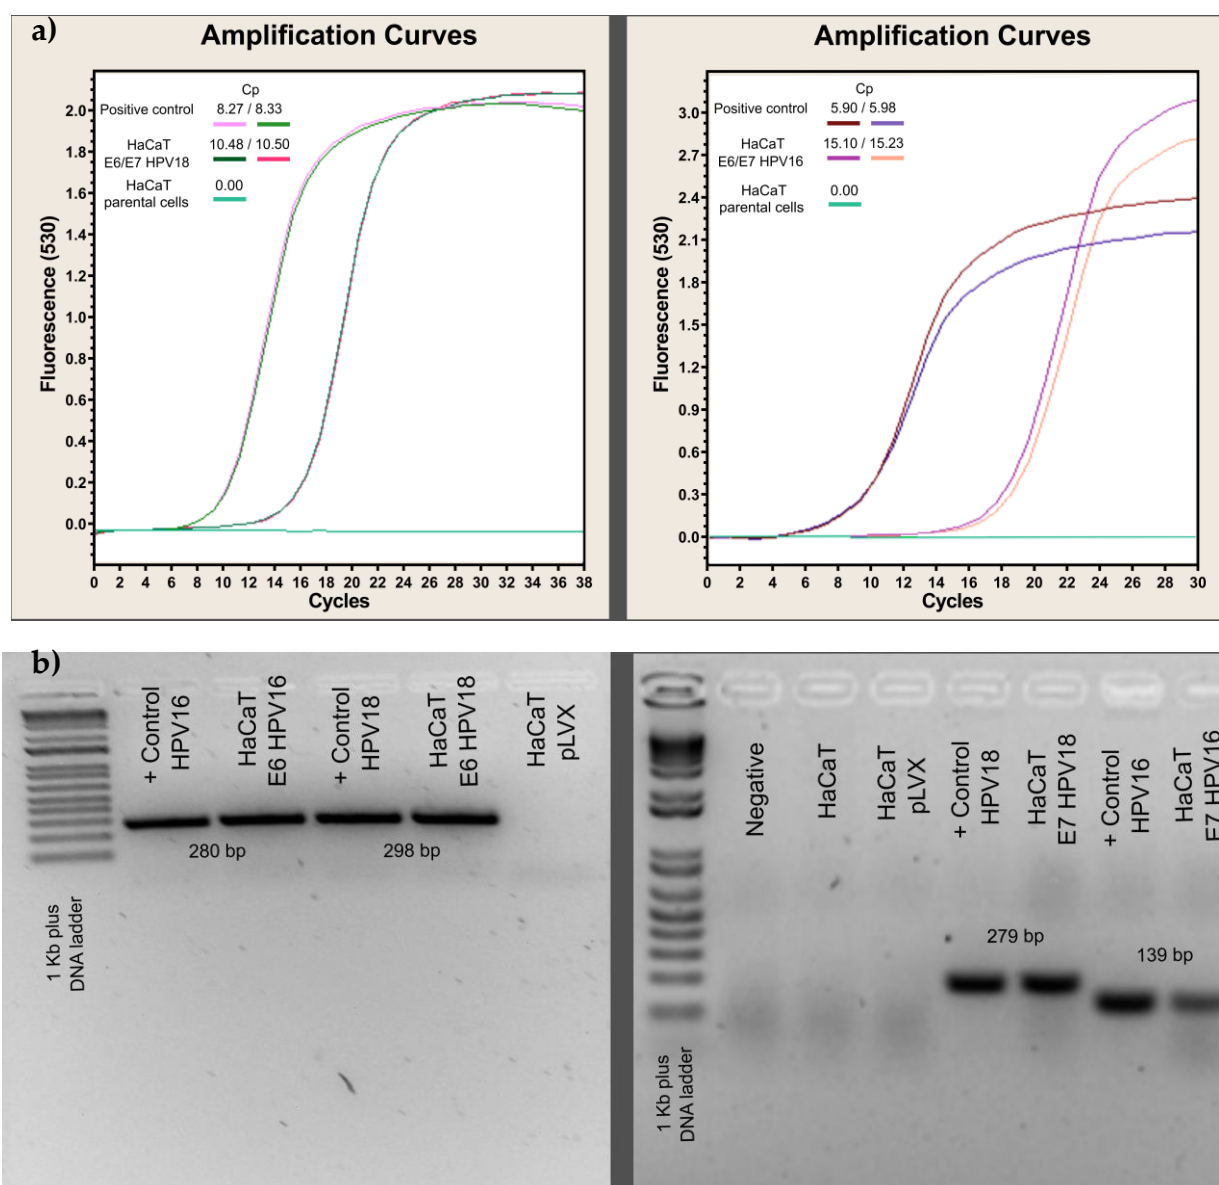

**c) Primer sets sequences used for amplification of E6 and E7 oncogenes.**

| Primer   | Fwd. Sequence                       | Rev. Sequence                       | Product length |
|----------|-------------------------------------|-------------------------------------|----------------|
| E6 HPV16 | 5' CAG AGC TGC AAA CAA CTA TAC 3'   | 5' AGT GGC TTT TGA CAG TTA ATA C 3' | 280 bp         |
| E6 HPV18 | 5' GCG ACC CTA CAA GCT ACC TGA T 3' | 5' GCA CCG CAG GCA CCT TAT TA 3'    | 298 bp         |
| E7 HPV16 | 5' GAC AAG CAG AAC CGG ACA G 3'     | 5' ATT CCT AGT GTG CCC ATT AAC A 3' | 139 bp         |
| E7 HPV18 | 5' TGT CAC GAG CAA TTA AGC GAC T 3' | 5' CAC ACA AAG GAC AGG GTG TTC A 3' | 279 bp         |

**Figure S1. Validation of E6/E7 expression on HaCaT-transduced cell models.** **a)** The graphs shown the amplification curves and CPs derived from real-time-PCR utilizing specific primers for *E6* and *E7* oncogenes from HPV 16 and 18. Pure plasmid LVX with *E6/E7* of HPV 16 and 18 were included as positive controls, and HaCaT parental cells were also included. **b)** Electrophoresis on 2% agarose gels were addressed to demonstrate the presence of the amplicon; we expected the following lengths: *E6* HPV16 = 280 bp, *E6* HPV18 = 298 bp, *E7* HPV16 = 139 bp, and *E7* HPV18 = 279 bp. Positive controls: Pure plasmids LVX with *E6/E7* of HPV 16 or 18; Negative controls: HaCaT and HaCaT pLVX. **c)** Sequences used to amplify *E6* or *E7* from HPV16 or 18.

Supplementary Table S1. Primer sets sequences used in qPCR.

| Primer        | Fwd. Sequence                        | Rev. Sequence                          | Product length | Annealing temp. |
|---------------|--------------------------------------|----------------------------------------|----------------|-----------------|
| <i>CCL2</i>   | 5' GCA GCA AGT GTC CCA A<br>3'       | 5' CCC AAG TCT CTG TAT CTA<br>AAA 3'   | 337 bp         | 54°C            |
| <i>CCL28</i>  | 5' AGC TGT TGC ACG GAG<br>GTT T 3'   | 5' TTC TTG GCA GCT TGC ACT<br>TTC 3'   | 191bp          | 60°C            |
| <i>CXCL1</i>  | 5' TCA AGA ATG GGC GGA<br>AAG 3'     | 5' CTT CTC CTA AGC GAT GCT<br>CAA 3'   | 231 bp         | 58°C            |
| <i>CXCL2</i>  | 5' GCT TGT CTC AAC CCC<br>GCA 3'     | 5' CAC ATT AGG CGC AAT CCA<br>GGT 3'   | 192 bp         | 60°C            |
| <i>CXCL3</i>  | 5' GGG AGC ACC AAC TGA C<br>3'       | 5' GAA CCC TCG TAA GAA ATA<br>GTC 3'   | 168 bp         | 56°C            |
| <i>CXCL6</i>  | 5' GTC TGG ACC CGG AAG C 3'          | 5' CCC CAC ACT CTT CAA AGT<br>GG 3'    | 219 bp         | 60°C            |
| <i>CXCL8</i>  | 5' GTG CAG AGG GTT GTG GA<br>3'      | 5' ACC AGG AAT CTT GTA TTG<br>CAT 3'   | 179 bp         | 56°C            |
| <i>CXCL10</i> | 5' GGC CAT CAA GAA TTT<br>ACT GA 3'  | 5' CAT TAT AGT GCC AGG GTA<br>GAG 3'   | 292 bp         | 54°C            |
| <i>CXCL11</i> | 5' AGT GAA AGT GGC AGA<br>TAT TG 3'  | 5' CTT TTC CAG GAC TTC ATA<br>TGT 3'   | 200 bp         | 56°C            |
| <i>RPLP0</i>  | 5' CCT CAT ATC CGG GGG<br>AAT GTG 3' | 5' GCA GCA GCT GGC ACC TTA<br>TTG 3'   | 95 bp          | 58°C            |
| <i>RPS18</i>  | 5' CGA TGG GCG GCG GAA<br>AA 3'      | 5' CAG TCG CTC CAG GTC TTC<br>ACG G 3' | 283 bp         | 58°C            |

Supplementary Table S2. Summary of all analyses performed.

| Chemokine     | <sup>1</sup> Cervical Cancer-derived cell lines (RNAseq) |         |          | <sup>1</sup> HaCaT-transduced cell models (RNAseq) |             | <sup>2</sup> HaCaT-transduced cell models (2-ΔΔCp) |             | <sup>1</sup> Expression profile of CESC biopsies from TCGA (RNAseq) | <sup>3</sup> Overall Survival Analysis (upregulation / prognosis) |
|---------------|----------------------------------------------------------|---------|----------|----------------------------------------------------|-------------|----------------------------------------------------|-------------|---------------------------------------------------------------------|-------------------------------------------------------------------|
|               | SiHa                                                     | HeLa    | C33A     | E6/E7 HPV16                                        | E6/E7 HPV18 | E6/E7 HPV16                                        | E6/E7 HPV16 |                                                                     |                                                                   |
| <i>CCL2</i>   | ▼ -5.13                                                  | ▼ -3.93 | ▼ -11.03 | ▲ 4.62                                             | ▲ 3.94      | ▲ 2.95                                             | ▲ 3.03      | NS                                                                  | NS                                                                |
| <i>CCL28</i>  | ▲ 1.66                                                   | ▼ -4.99 | ▼ -5.54  | ▲ 1.48                                             | ▲ 4.28      | ▲ 2.45                                             | ▲ 6.94      | ▲ 0.69                                                              | NS                                                                |
| <i>CXCL1</i>  | ▼ -5.32                                                  | ▼ -9.73 | ▼ -8.24  | ▲ 3.54                                             | ▲ 3.62      | ▼ -0.18                                            | ▲ 1.81      | ▲ 4.84                                                              | Worse                                                             |
| <i>CXCL2</i>  | ▲ 5.14                                                   | ▲ 5.30  | NS       | ▲ 2.73                                             | ▲ 4.06      | ▲ 3.82                                             | ▲ 3.64      | NS                                                                  | Worse                                                             |
| <i>CXCL3</i>  | ▲ 3.13                                                   | ▲ 3.43  | NS       | NS                                                 | ▲ 4.75      | ▲ 4.01                                             | ▲ 6.19      | ▲ 2.41                                                              | Worse                                                             |
| <i>CXCL6</i>  | ▼ -8.09                                                  | ▼ -7.89 | ▼ -8.85  | ▲ 3.02                                             | ▲ 2.30      | ▲ 4.07                                             | ▲ 3.26      | ▲ 2.14                                                              | Worse                                                             |
| <i>CXCL8</i>  | ▼ -3.21                                                  | ▼ -2.29 | ▼ -9.66  | ▲ 1.18                                             | ▲ 1.74      | ▲ 0.85                                             | ▲ 3.01      | ▲ 5.22                                                              | Worse                                                             |
| <i>CXCL10</i> | ▲ 3.62                                                   | ▲ 5.05  | NS       | ▲ 4.72                                             | ▲ 6.42      | ▲ 3.99                                             | ▲ 5.58      | ▲ 5.72                                                              | Better                                                            |
| <i>CXCL11</i> | ▲ 4.36                                                   | ▲ 3.82  | NS       | NS                                                 | ▲ 2.55      | ▲ 2.42                                             | ▲ 2.50      | ▲ 3.94                                                              | Worse                                                             |

\* The table summarizes the results of each analysis executed in the present study. <sup>1</sup>The Differential Expression Analysis was performed on Cervical Cancer-derived cell lines, HaCaT-transduced cell models, and CESC biopsies from the TCGA Database. <sup>2</sup>For the Relative Expression Analysis on HaCaT-transduced cell models, to normalize the expression data, the *RPS18* and *RPLP0* were taken as reference genes. The data displayed are the means of the two replicates of each reference gene. <sup>3</sup>Overall survival data correlates the upregulation of the chemokine panel with the patient's prognosis. All the resulting outputs from the Differential Expression Analysis (RNAseq) and the Relative Expression (2-ΔΔCp) are shown as Log2 Fold-Change. ▲ Upregulation; ▼ Downregulation; (NS) Non-significant.
